# Supplementary material
Source: PubMed Central journal article supplement (PMC3087307)

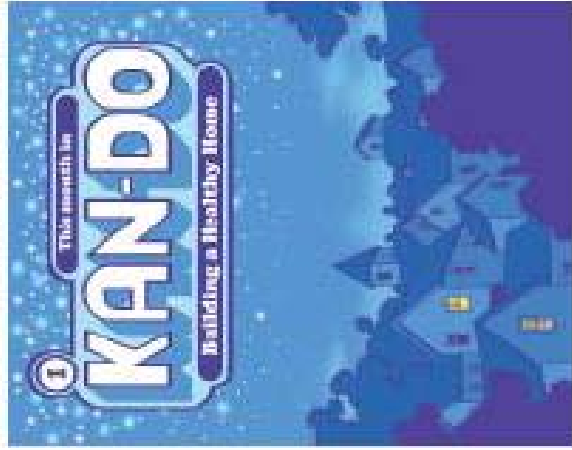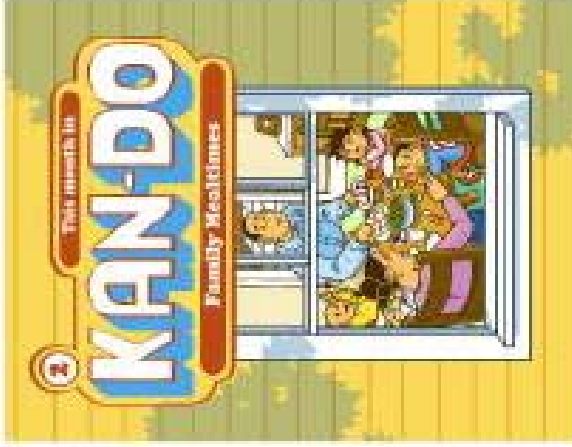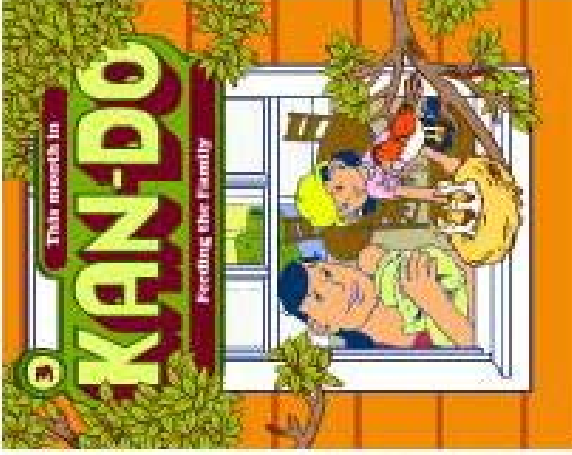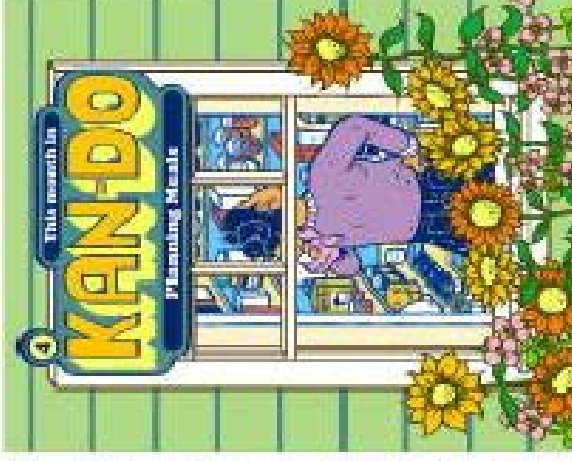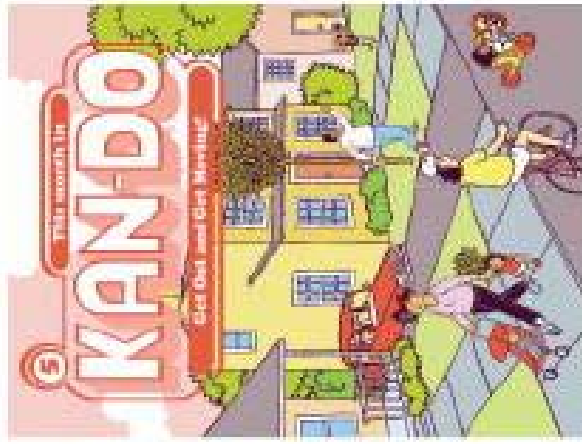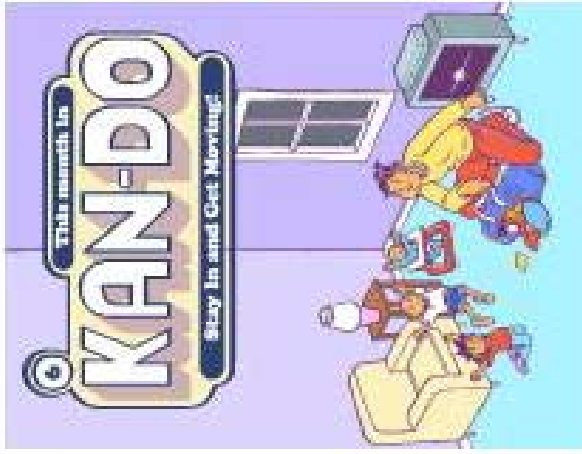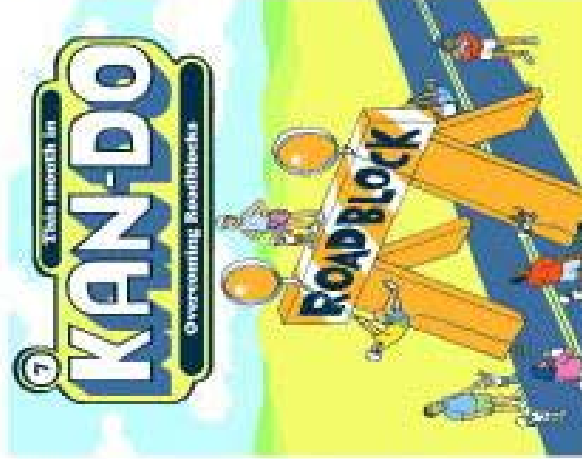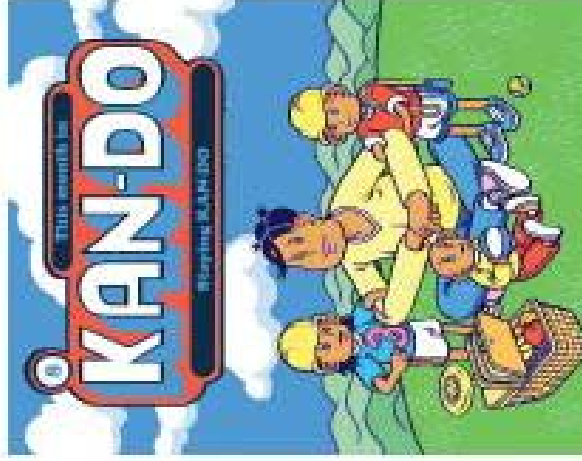

Supplement: NIHMS282861-supplement-01.pdf [file NIHMS282861-supplement-01.pdf]
